# Supplementary material for: Levels of Systemic Low-grade Inflammation in Pregnant Mothers and Their Offspring are Correlated
Source: PubMed Central journal article supplement (PMC6395736; doi:10.1038/s41598-019-39620-5), 2019-02-28

## **Title page; Supplementary Information**

### **Levels of Systemic Low-grade Inflammation in Pregnant Mothers and Their Offspring are Correlated**

**Authors:** Nadia Rahman Fink, MD<sup>1</sup>, Bo Chawes, MD, PhD, DMSc<sup>1</sup>, Klaus Bønnelykke<sup>1</sup>, MD, PhD, Jonathan Thorsen<sup>1</sup>, MD, Jakob Stokholm, MD, PhD<sup>1+2</sup>, Morten Arendt Rasmussen<sup>1+3</sup>, MSc, PhD, Susanne Brix<sup>4</sup>, MSc, PhD, Hans Bisgaard, MD, DMSc<sup>1</sup>.

#### **Affiliation:**

- 1) COPSAC, Copenhagen Prospective Studies on Asthma in Childhood, Copenhagen University Hospital, Herlev-Gentofte,, Denmark
- 2) Department of Pediatrics, Naestved Hospital, Naestved, Denmark.
- 3) Department of Food Science, Faculty of Science, University of Copenhagen, Copenhagen, Denmark
- 4) Department of Biotechnology and Biomedicine, Technical University of Denmark, Lyngby, Denmark.

#### **Correspondence:**

Professor Hans Bisgaard, MD, DMSc

E-mail: [bisgaard@copsac.com](mailto:bisgaard@copsac.com)

Website: [www.copsac.com](http://www.copsac.com)

**Supplement table 1. Associations between mother and child systemic low-grade inflammation, with hs-CRP levels stratified for current infections (within 14 days) at time of blood sampling.**

|                                                                   | <b>Children <i>with</i> infections<br/>(n= 175)</b> |                |                      |          | <b>Children <i>without</i> infection<br/>(n= 384)</b> |                |                      |          | <b>All children<br/>(n = 640)</b> |               |                      |          |
|-------------------------------------------------------------------|-----------------------------------------------------|----------------|----------------------|----------|-------------------------------------------------------|----------------|----------------------|----------|-----------------------------------|---------------|----------------------|----------|
|                                                                   | <b>Est.</b>                                         | <b>95% CI</b>  | <b>R<sup>2</sup></b> | <b>p</b> | <b>Est.</b>                                           | <b>95% CI</b>  | <b>R<sup>2</sup></b> | <b>p</b> | <b>Est.</b>                       | <b>95% CI</b> | <b>R<sup>2</sup></b> | <b>p</b> |
| <b>Mother pregnancy week 24 vs. offspring age 6 months</b>        |                                                     |                |                      |          |                                                       |                |                      |          |                                   |               |                      |          |
| Multivariable analysis with all significant risk factors (p<0.05) | 0.09                                                | [-0.09 – 0.27] | 0.10                 | 0.32     | 0.10                                                  | [-0.02 – 0.21] | 0.18                 | 0.11     | 0.11                              | [0.01–0.20]   | 0.22                 | 0.03     |
| Backward selected model                                           | 0.06                                                | [-0.08 – 0.20] | 0.08                 | 0.38     | 0.06                                                  | [-0.04 – 0.17] | 0.17                 | 0.25     | 0.11                              | [0.02–0.21]   | 0.21                 | 0.02     |
| <b>Mother one-week postpartum vs. offspring age 6 months</b>      |                                                     |                |                      |          |                                                       |                |                      |          |                                   |               |                      |          |
| Multivariable analysis with all significant risk factors (p<0.05) | 0.08                                                | [-0.05 – 0.22] | 0.10                 | 0.23     | 0.09                                                  | [-0.01 – 0.19] | 0.20                 | 0.05     | 0.09                              | [0.01–0.16]   | 0.23                 | 0.03     |
| Backward selected model                                           | 0.10                                                | [-0.02 – 0.22] | 0.09                 | 0.09     | 0.07                                                  | [-0.02 – 0.16] | 0.18                 | 0.13     | 0.08                              | [0.02–0.21]   | 0.22                 | 0.047    |

**Supplement figure 1a-c.** CRP risk factor analysis for the three time-points: pregnancy week 24 (panel A), one-week postpartum (panel B) and children age 6 months (panel C). The figures depict geometric mean ratio (95% CI).

a) Pregnancy week 24

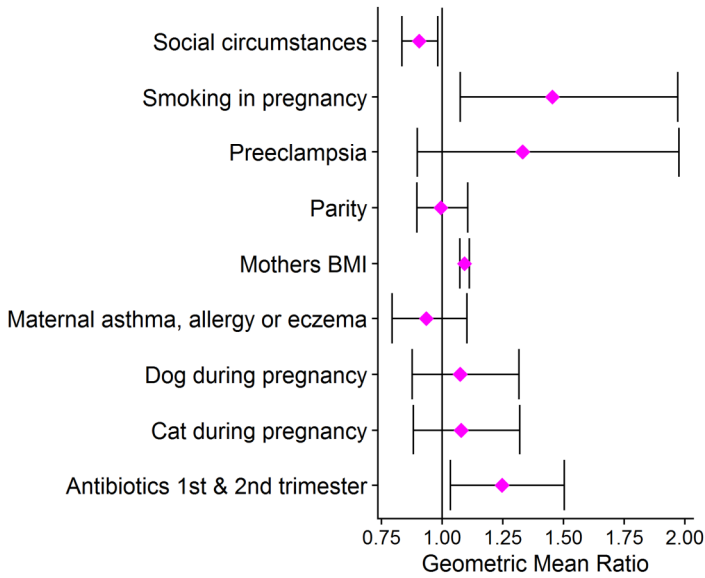

b) One-week postpartum

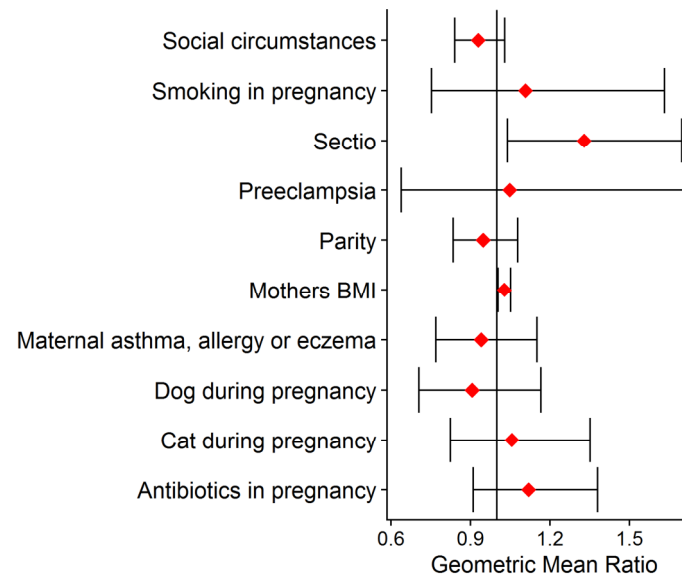

c) Children age 6 month

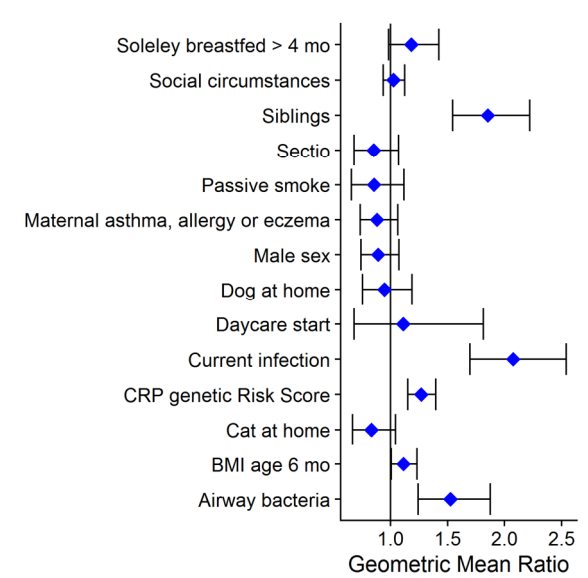

Supplement: 41598_2019_39620_MOESM1_ESM.pdf [file 41598_2019_39620_MOESM1_ESM.pdf]
